# Supplementary material
Source: MDPI journal article supplement (https://www.mdpi.com/search?q=ijerph-18-03589)
Supplement: s001 [file ijerph-18-03589-s001.pdf]

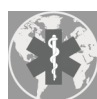

## Supplementary Materials

| Contents                                                                                                                                                                                                                        | Page |
|---------------------------------------------------------------------------------------------------------------------------------------------------------------------------------------------------------------------------------|------|
| Figure S1: Section from No Money No Time Homepage                                                                                                                                                                               | 3    |
| Figure S2: Section of dietary feedback report from the embedded dietary assessment tool—Healthy Eating Quiz                                                                                                                     | 3    |
| Figure S3: Section of recipe page on No Money No Time with filters                                                                                                                                                              | 4    |
| Figure S4: Section of personal dashboard on No Money No Time                                                                                                                                                                    | 4    |
| Figure S5: Engagement information from Google Analytics for all users of No Money No Time.                                                                                                                                      | 5    |
| Figure S6: Funnel report to map out the customer journey on No Money No Time website from 17 July 2019 to 17 July 2020                                                                                                          | 6    |
| Figure S7: Engagement information from Google Analytics for return users vs new users of No Money No Time.                                                                                                                      | 7    |
| Figure S8: Engagement information from Google Analytics for young adults 18–34 years compared to the rest of sample from No Money No Time.                                                                                      | 8    |
| Figure S9: User-acquisition data from Google Analytics by channel for new users and returning users.                                                                                                                            | 9    |
| Figure S10: User-acquisition and engagement data from Google Analytics by channel for young adults (18–34 years) and all other users.                                                                                           | 10   |
| Figure S11: User-acquisition and engagement data from Google Analytics by device type for young adults (18–34 years) and all other users.                                                                                       | 11   |
| Figure S12: Mobile device use for all users accessing No Money No Time from 17 July 2019 to 17 July 2020                                                                                                                        | 12   |
| Figure S13: Mobile device use for young adults (18–34 years) accessing No Money No Time from 17 July 2019 to 17 July 2020                                                                                                       | 13   |
| Figure S14: Google analytics ‘benchmarking’ comparison of traffic acquisition for ‘No Money No Time’ with aggregated industry data from 13,034 food and drink websites from 17 July 2019 to 17 July 2020                        | 14   |
| Figure S15: Google analytics ‘benchmarking’ comparison of traffic acquisition ‘No Money No Time’ with aggregated industry data from 1830 websites with ‘Cooking & Recipes’ category from 17 July 2019 to 17 July 2020           | 15   |
| Figure S16: Google analytics ‘benchmarking’ comparison of device type recruitment and engagement data of ‘No Money No Time’ with aggregated industry data from 13,034 food and drink websites from 17 July 2019 to 17 July 2020 | 16   |

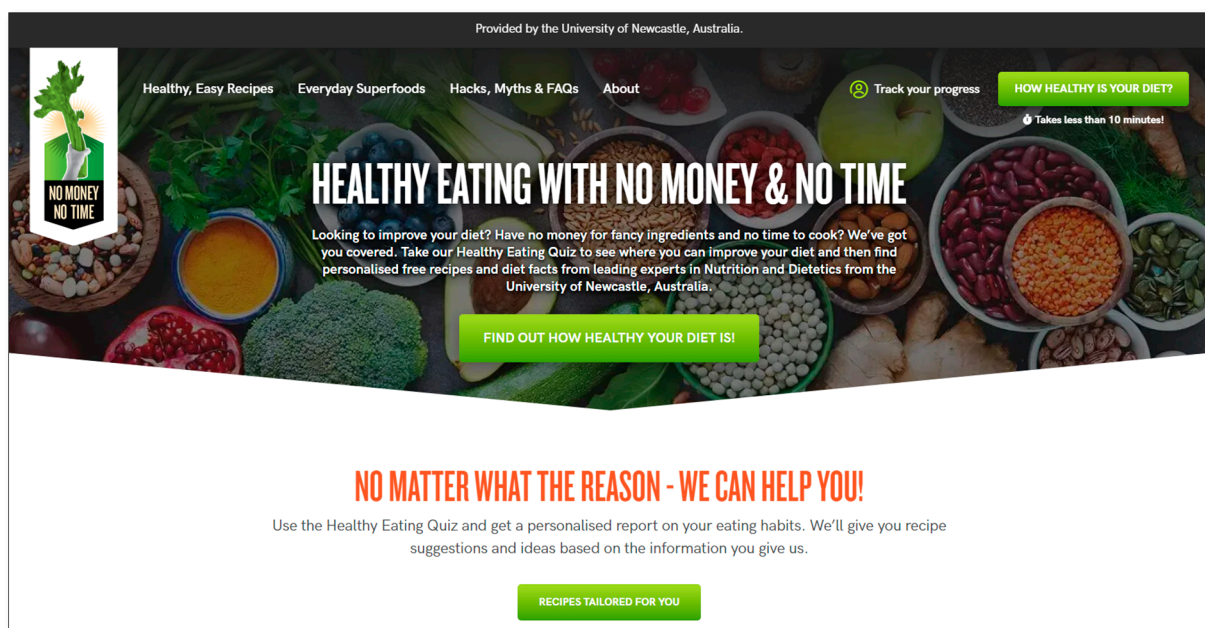

**Figure 1.** Section from No Money No Time Homepage.

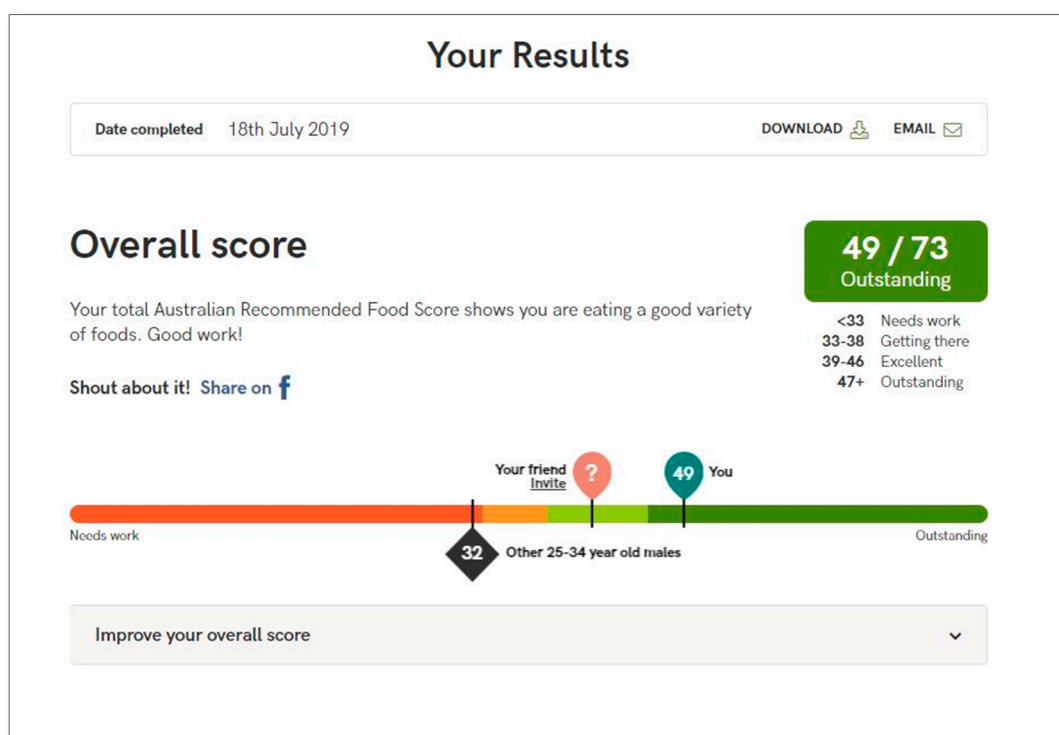

**Figure 2.** Section of dietary feedback report from the embedded dietary assessment tool—Healthy Eating Quiz.

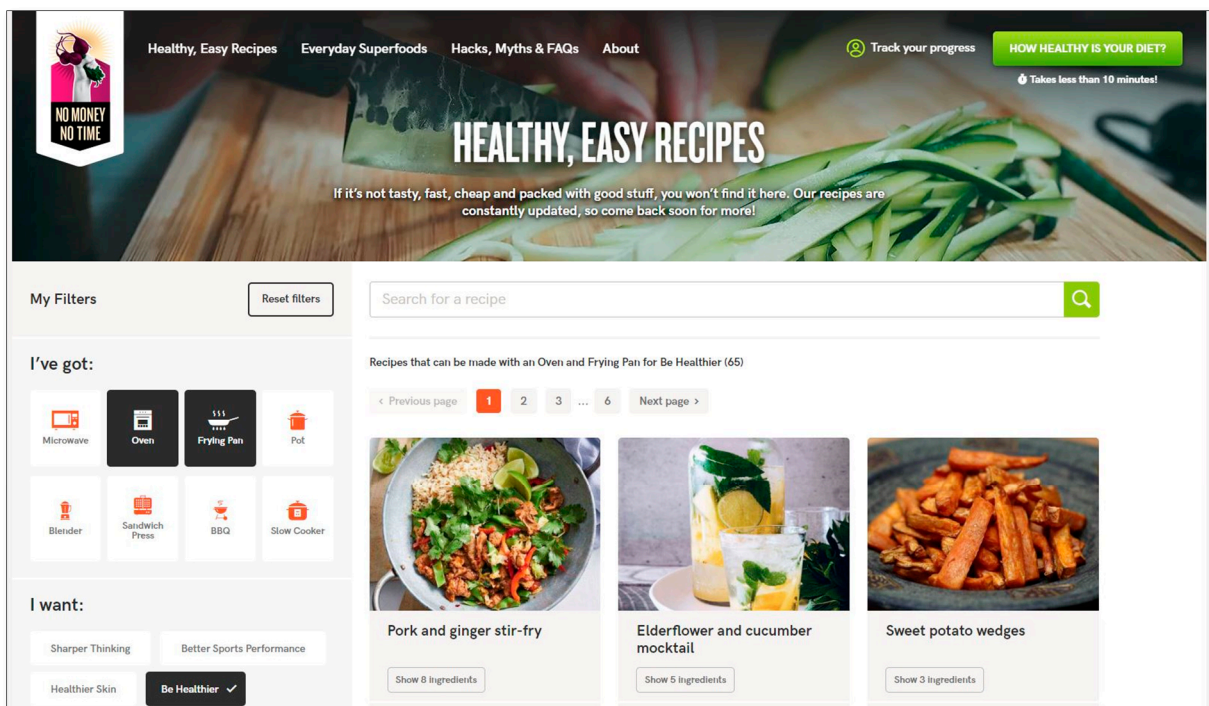

Figure 3. Section of recipe page on No Money No Time with filters.

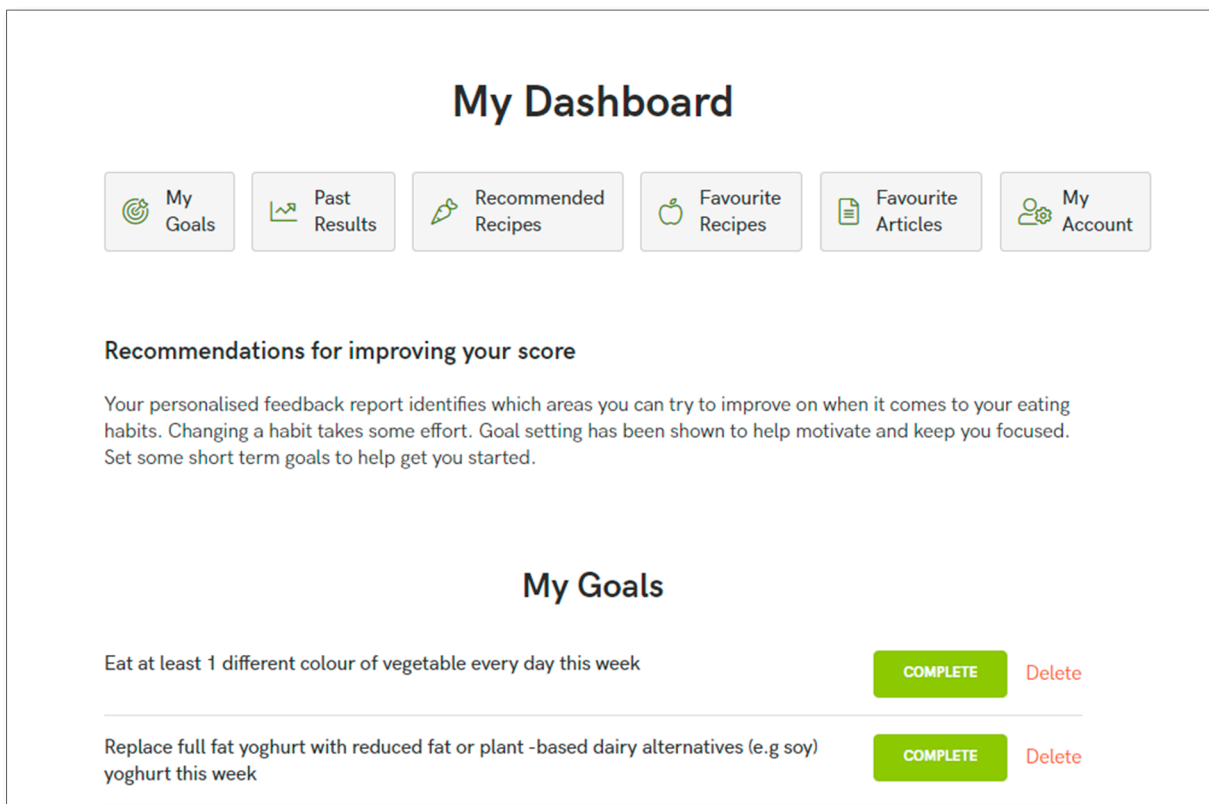

Figure 4. Section of personal dashboard on No Money No Time.

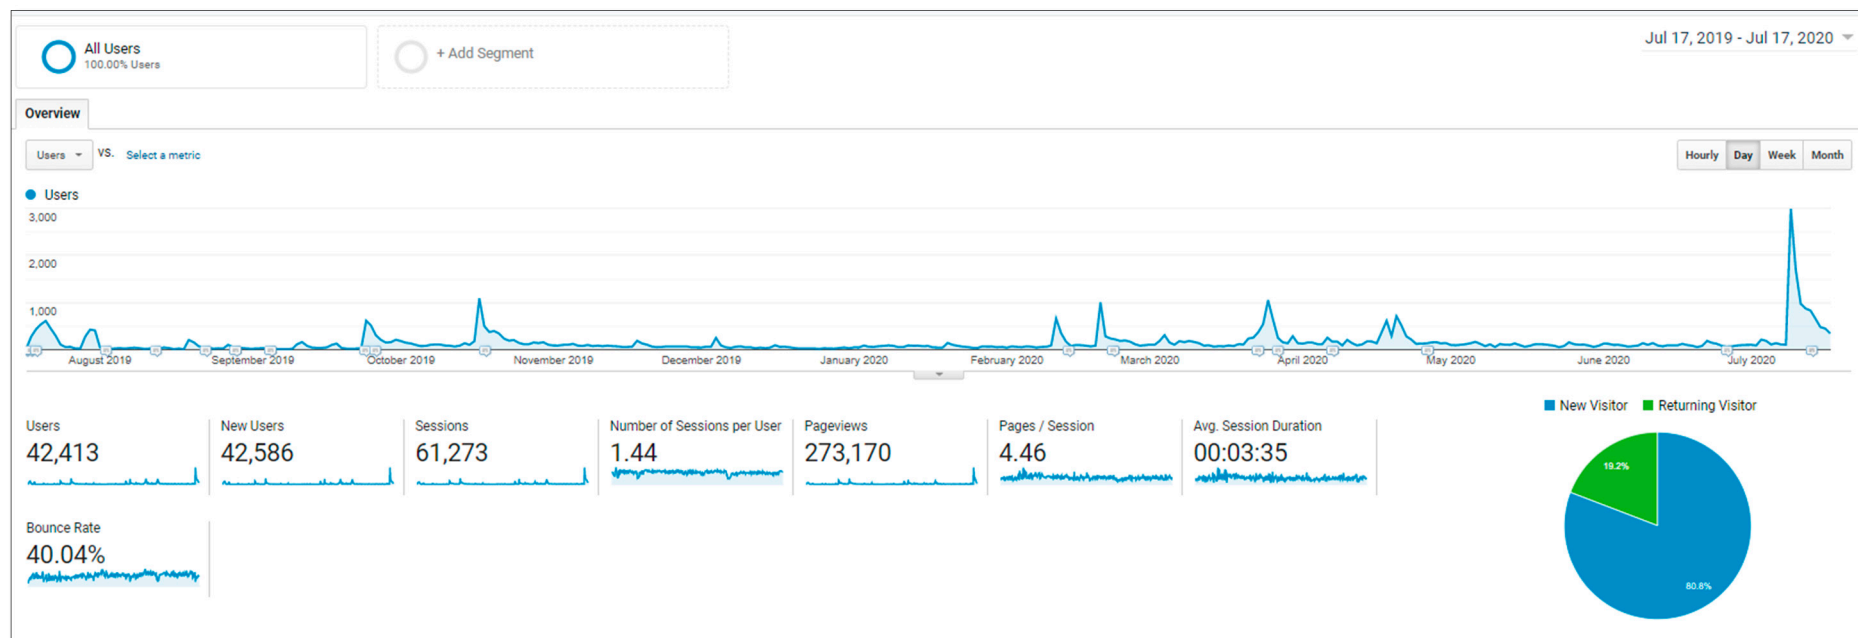

**Figure 5.** Engagement information from Google Analytics for all users of No Money No Time.

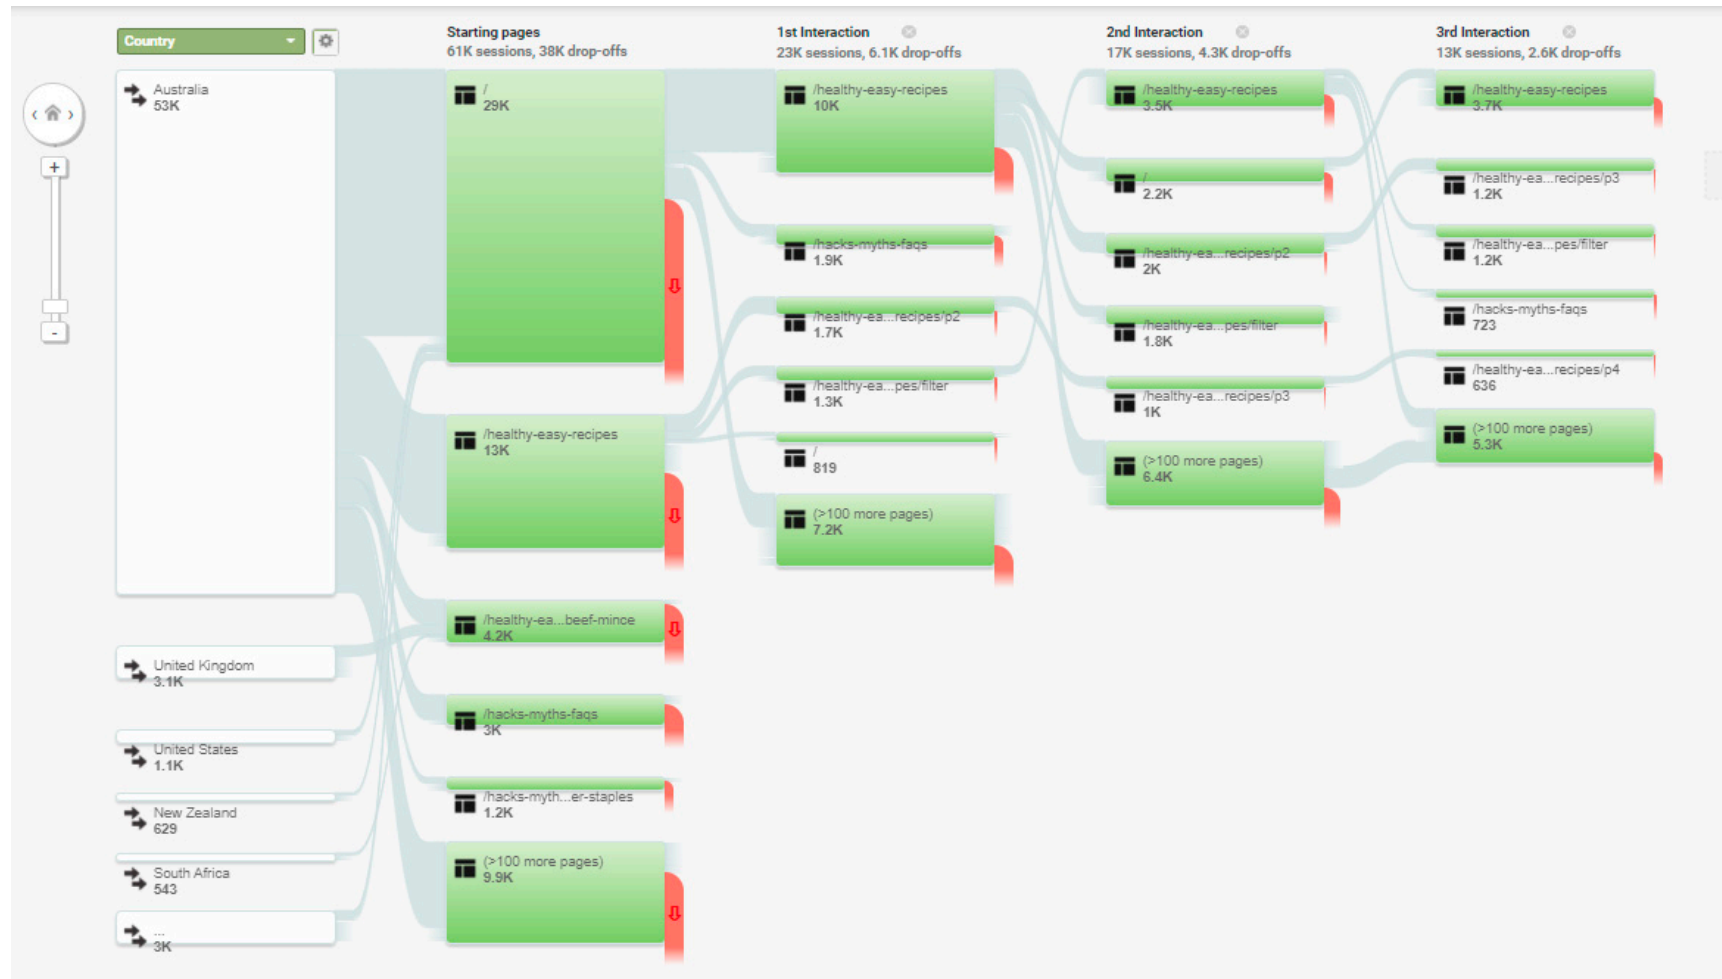

**Figure 6.** Funnel report to map out the customer journey on No Money No Time website from 17 July 2019 to 17 July 2020.

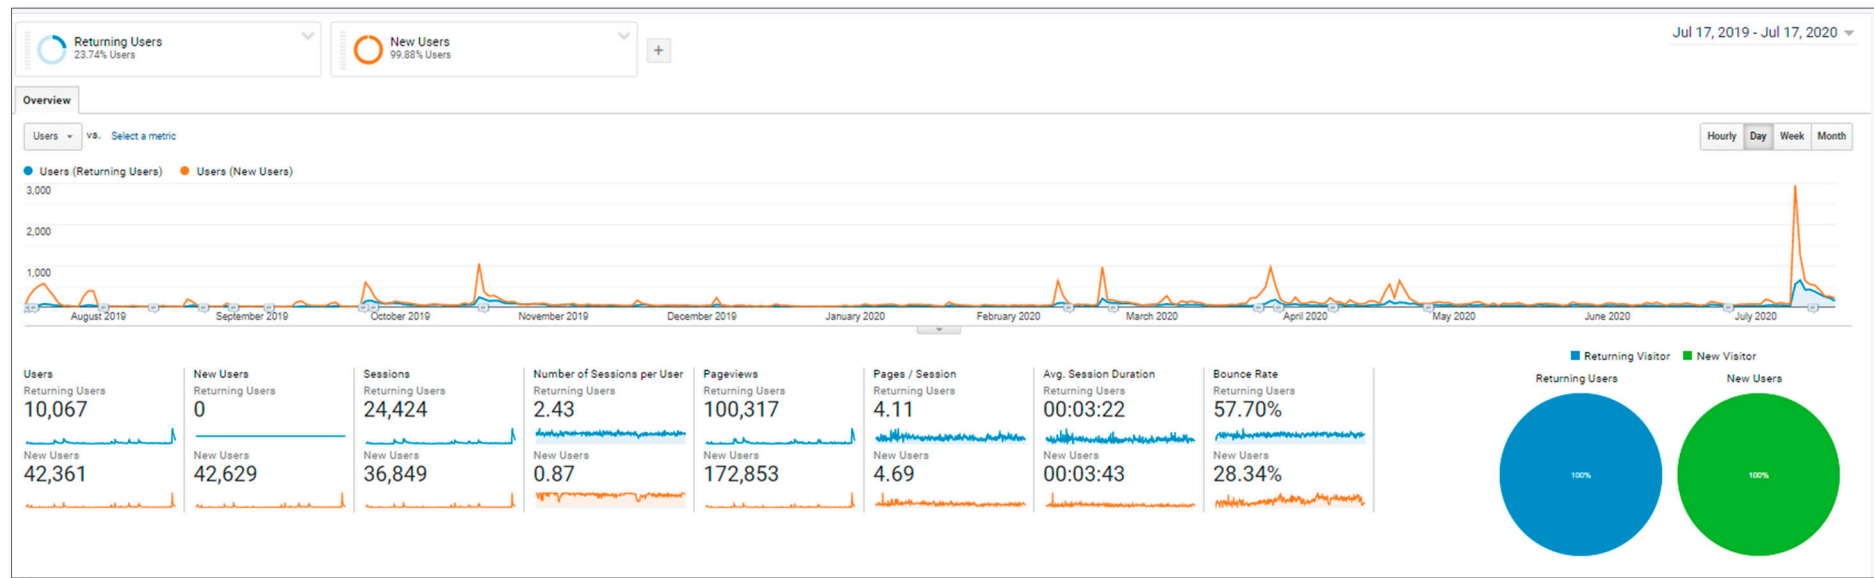

Figure 7. Engagement information from Google Analytics for return users vs new users of No Money No Time.

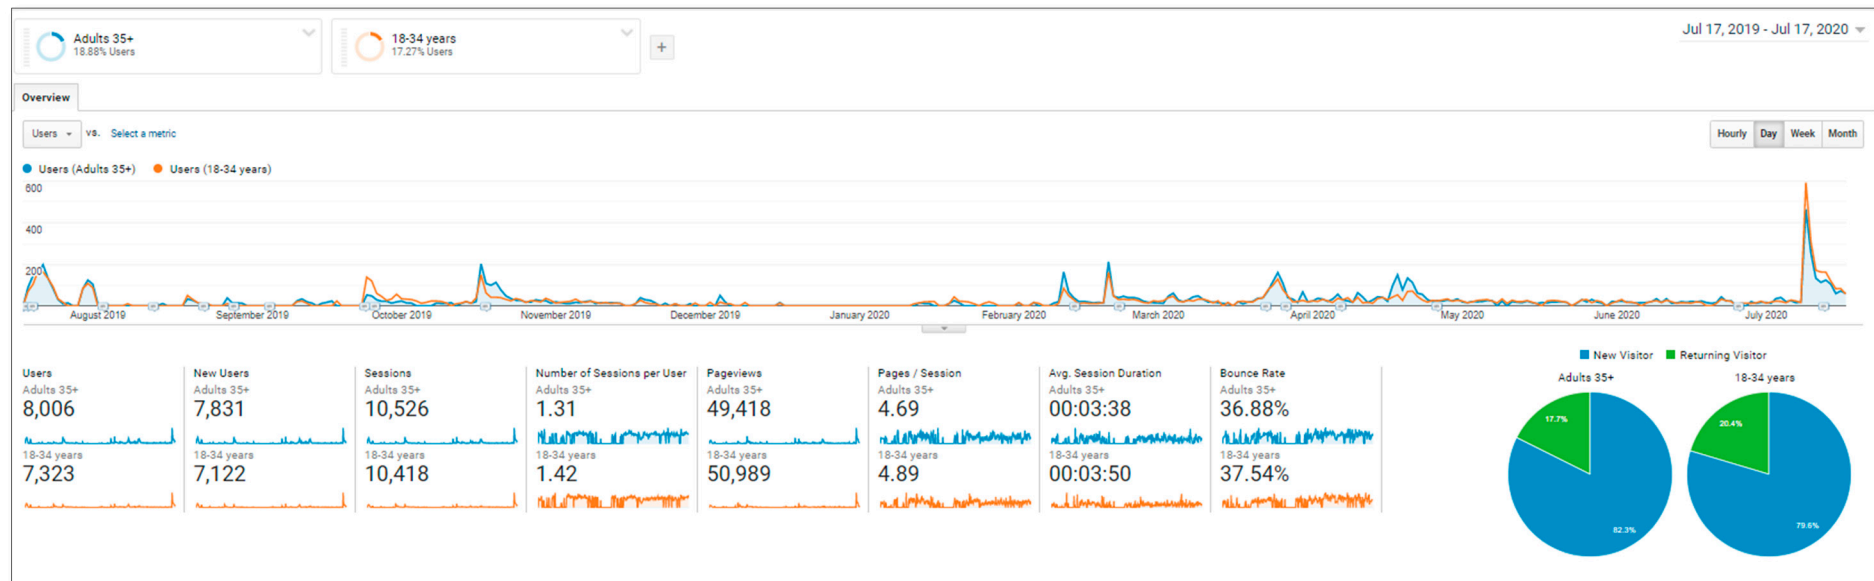

**Figure 8.** Engagement information from Google Analytics for young adults 18–34 years compared to the rest of sample from No Money No Time.



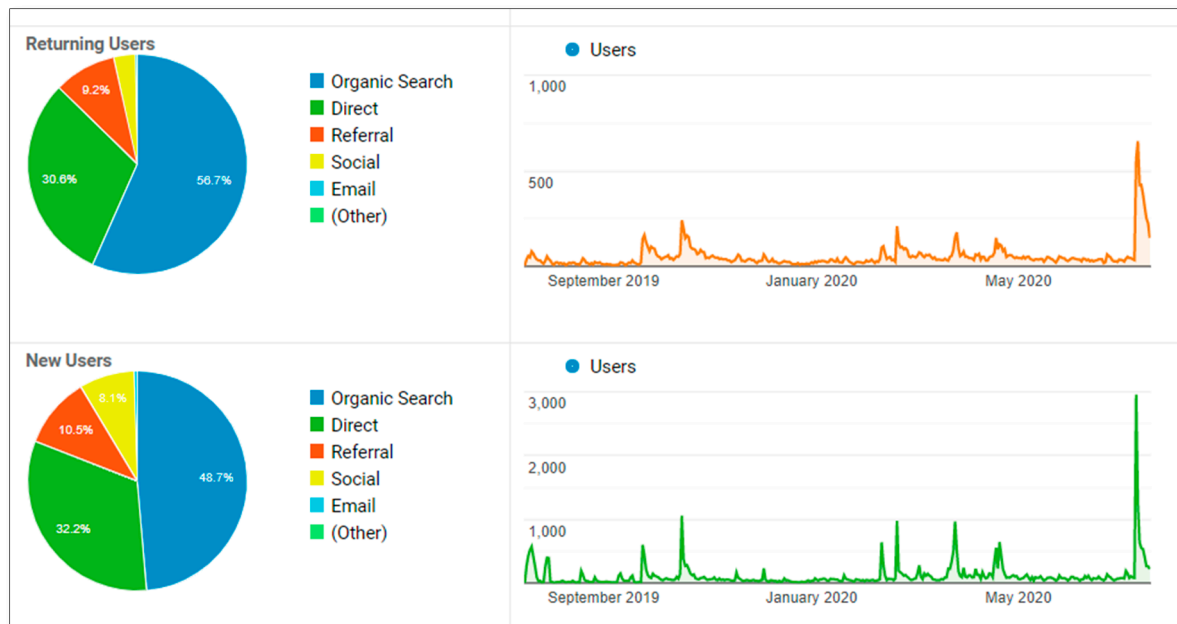

Figure 9. User-acquisition data from Google Analytics by channel for new users and returning users.

| Default Channel Grouping | Acquisition                          |                                      |                                       | Behavior                                |                                    |                                            | Conversions                                         |  |
|--------------------------|--------------------------------------|--------------------------------------|---------------------------------------|-----------------------------------------|------------------------------------|--------------------------------------------|-----------------------------------------------------|--|
|                          | Users                                | New Users                            | Sessions                              | Bounce Rate                             | Pages / Session                    | Avg. Session Duration                      | Clicks Quiz Call to Action (Goal 1 Conversion Rate) |  |
| <b>Adults 35+</b>        | 8,006<br>% of Total: 18.88% (42,413) | 7,826<br>% of Total: 18.36% (42,629) | 10,526<br>% of Total: 17.18% (61,273) | 36.88%<br>Avg for View: 40.04% (-7.90%) | 4.69<br>Avg for View: 4.46 (3.31%) | 00:03:38<br>Avg for View: 00:03:35 (1.34%) | 24.20%<br>Avg for View: 25.10% (-3.59%)             |  |
| <b>18-34 years</b>       | 7,323<br>% of Total: 17.27% (42,413) | 7,122<br>% of Total: 16.71% (42,629) | 10,418<br>% of Total: 17.00% (61,273) | 37.54%<br>Avg for View: 40.04% (-6.25%) | 4.89<br>Avg for View: 4.46 (9.78%) | 00:03:50<br>Avg for View: 00:03:35 (6.99%) | 26.20%<br>Avg for View: 25.10% (4.40%)              |  |
| 1. Organic Search        |                                      |                                      |                                       |                                         |                                    |                                            |                                                     |  |
| Adults 35+               | 3,564 (43.38%)                       | 3,362 (42.96%)                       | 5,185 (49.26%)                        | 38.55%                                  | 5.07                               | 00:03:56                                   | 26.11%                                              |  |
| 18-34 years              | 3,778 (50.49%)                       | 3,586 (50.35%)                       | 6,117 (58.72%)                        | 38.68%                                  | 5.22                               | 00:04:04                                   | 27.17%                                              |  |
| 2. Direct                |                                      |                                      |                                       |                                         |                                    |                                            |                                                     |  |
| Adults 35+               | 1,890 (23.01%)                       | 1,834 (23.43%)                       | 2,539 (24.12%)                        | 34.50%                                  | 4.59                               | 00:03:34                                   | 22.25%                                              |  |
| 18-34 years              | 1,614 (21.57%)                       | 1,566 (21.99%)                       | 2,318 (22.25%)                        | 36.28%                                  | 4.61                               | 00:03:38                                   | 24.20%                                              |  |
| 3. Referral              |                                      |                                      |                                       |                                         |                                    |                                            |                                                     |  |
| Adults 35+               | 1,653 (20.12%)                       | 1,589 (20.30%)                       | 1,747 (16.60%)                        | 36.41%                                  | 4.60                               | 00:03:38                                   | 17.52%                                              |  |
| 18-34 years              | 1,382 (18.47%)                       | 1,303 (18.30%)                       | 1,212 (11.63%)                        | 37.79%                                  | 4.73                               | 00:03:46                                   | 18.73%                                              |  |
| 4. Social                |                                      |                                      |                                       |                                         |                                    |                                            |                                                     |  |
| Adults 35+               | 1,060 (12.90%)                       | 996 (12.73%)                         | 1,000 (9.50%)                         | 34.60%                                  | 3.32                               | 00:02:19                                   | 31.90%                                              |  |
| 18-34 years              | 696 (9.30%)                          | 656 (9.21%)                          | 758 (7.28%)                           | 31.66%                                  | 3.41                               | 00:02:44                                   | 36.81%                                              |  |
| 5. Email                 |                                      |                                      |                                       |                                         |                                    |                                            |                                                     |  |
| Adults 35+               | 48 (0.58%)                           | 45 (0.58%)                           | 55 (0.52%)                            | 45.45%                                  | 2.47                               | 00:01:13                                   | 5.45%                                               |  |
| 18-34 years              | 13 (0.17%)                           | 11 (0.15%)                           | 13 (0.12%)                            | 46.15%                                  | 2.62                               | 00:00:23                                   | 7.69%                                               |  |

Figure 10. User-acquisition and engagement data from Google Analytics by channel for young adults (18–34 years) and all other users.



| Device Category ? | Acquisition                             |                                         |                                          |
|-------------------|-----------------------------------------|-----------------------------------------|------------------------------------------|
|                   | Users ? ↓                               | New Users ?                             | Sessions ?                               |
| Adults 35+        | 8,006<br>% of Total: 18.88%<br>(42,413) | 7,831<br>% of Total: 18.37%<br>(42,629) | 10,526<br>% of Total: 17.18%<br>(61,273) |
| 18-34 years       | 7,323<br>% of Total: 17.27%<br>(42,413) | 7,122<br>% of Total: 16.71%<br>(42,629) | 10,418<br>% of Total: 17.00%<br>(61,273) |
| 1. mobile         |                                         |                                         |                                          |
| Adults 35+        | 4,324 (53.96%)                          | 4,251 (54.28%)                          | 5,551 (52.74%)                           |
| 18-34 years       | 4,357 (59.62%)                          | 4,265 (59.88%)                          | 6,457 (61.98%)                           |
| 2. desktop        |                                         |                                         |                                          |
| Adults 35+        | 2,903 (36.23%)                          | 2,823 (36.05%)                          | 3,845 (36.53%)                           |
| 18-34 years       | 2,837 (38.82%)                          | 2,748 (38.58%)                          | 3,762 (36.11%)                           |
| 3. tablet         |                                         |                                         |                                          |
| Adults 35+        | 786 (9.81%)                             | 757 (9.67%)                             | 1,130 (10.74%)                           |
| 18-34 years       | 114 (1.56%)                             | 109 (1.53%)                             | 199 (1.91%)                              |

**Figure 11.** User-acquisition and engagement data from Google Analytics by device type for young adults (18–34 years) and all other users.

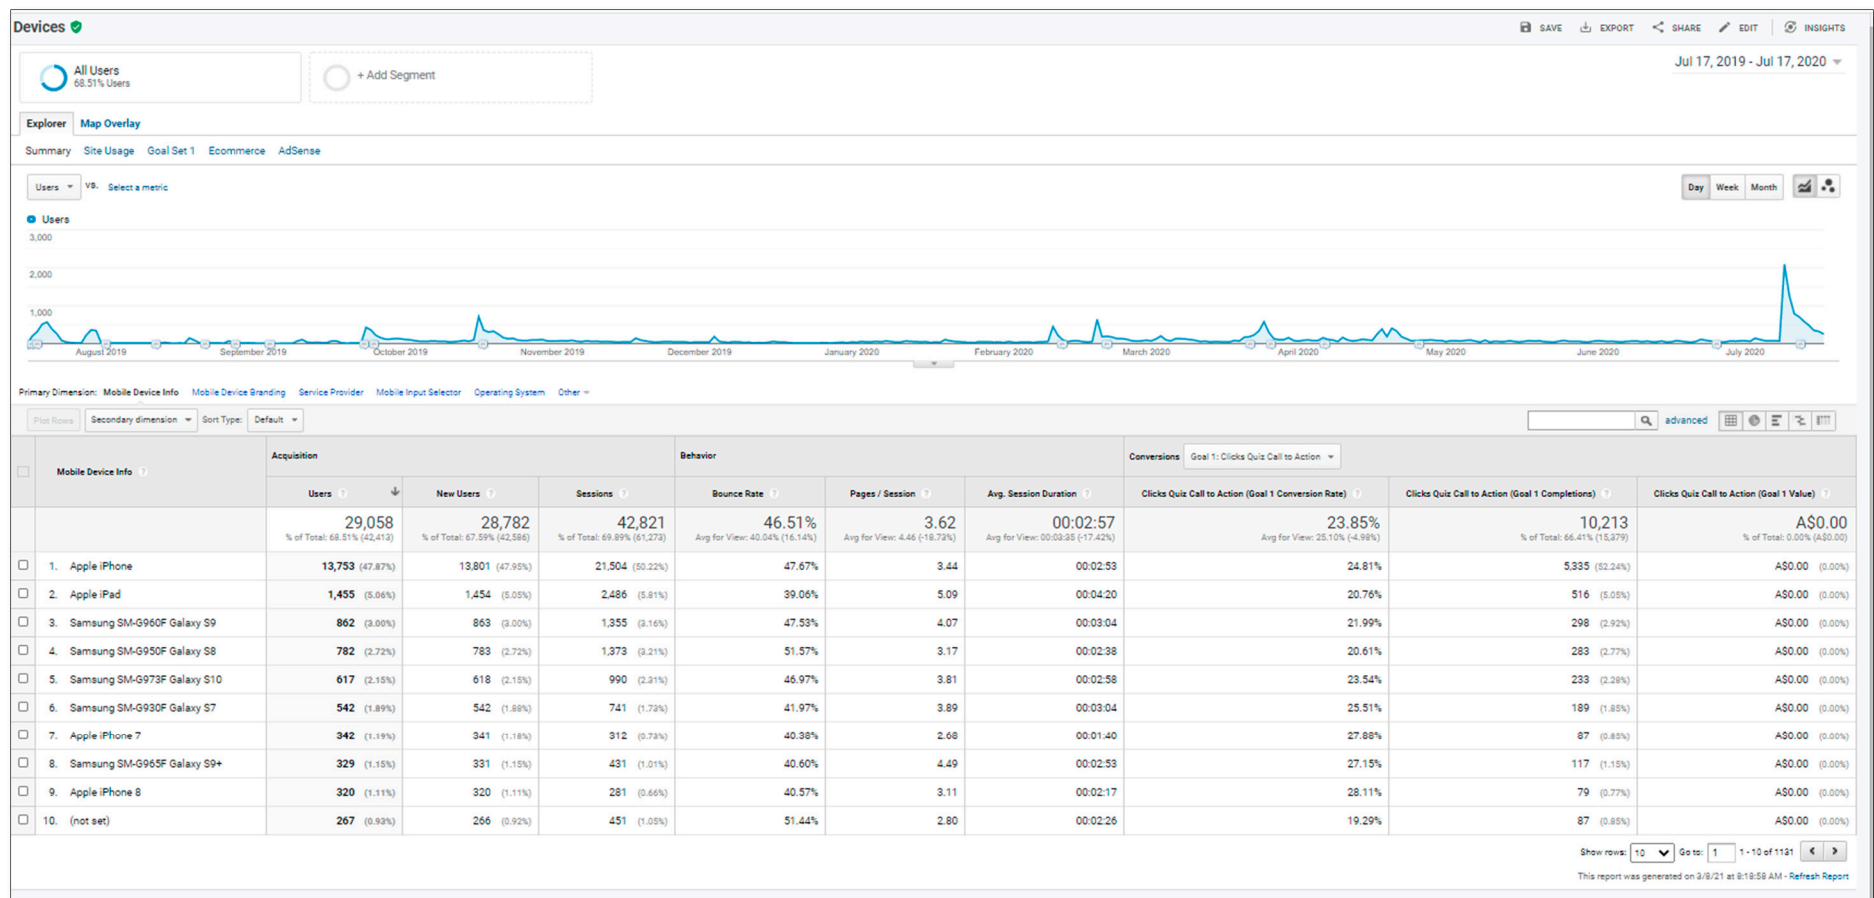

**Figure 12.** Mobile device use for all users accessing No Money No Time from 17 July 2019 to 17 July 2020.

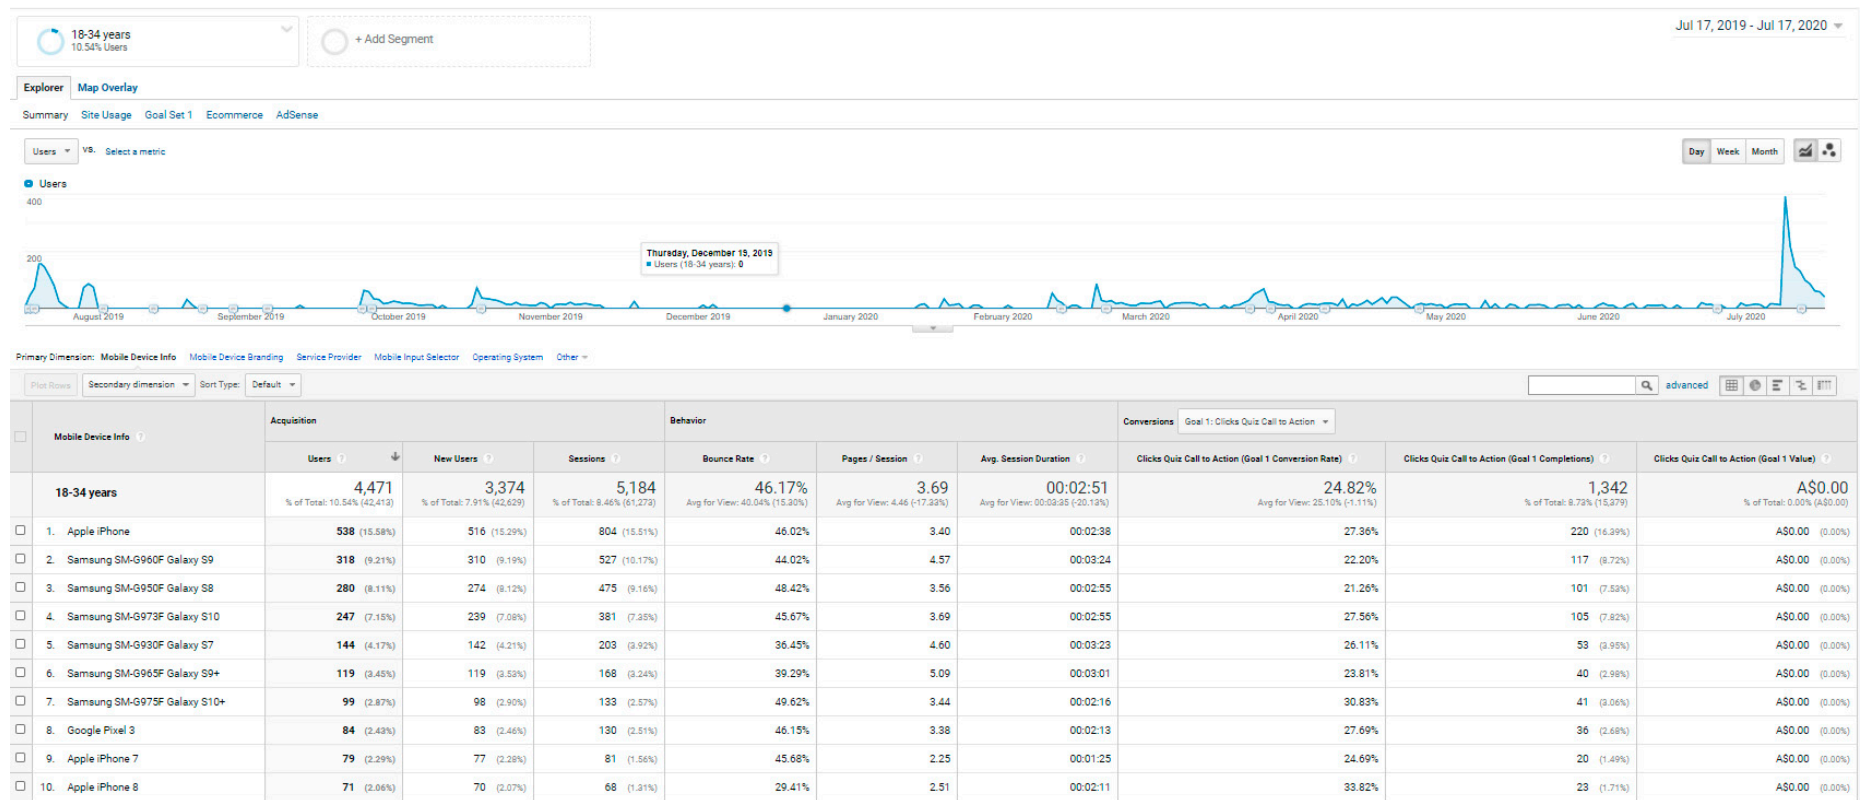

Figure 13. Mobile device use for young adults (18–34 years) accessing No Money No Time from 17 July 2019 to 17 July 2020.

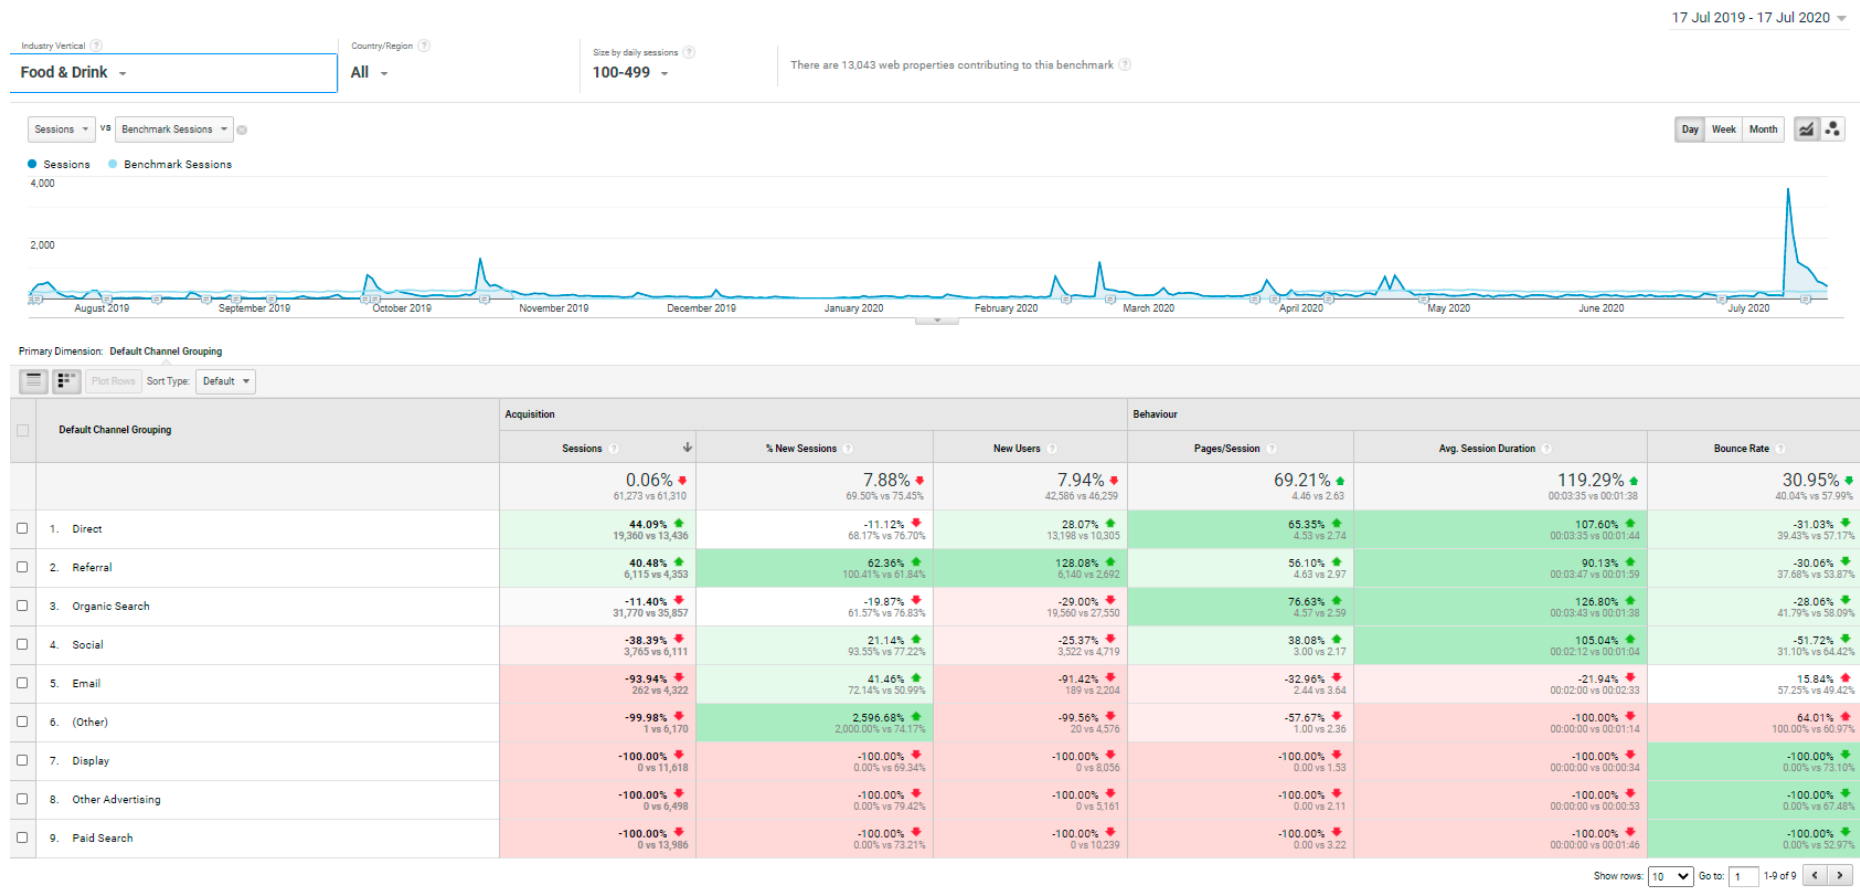

**Figure 14.** Google analytics 'benchmarking' comparison of traffic acquisition for 'No Money No Time' with aggregated industry data from 13,034 food and drink websites from 17 July 2019 to 17 July 2020.

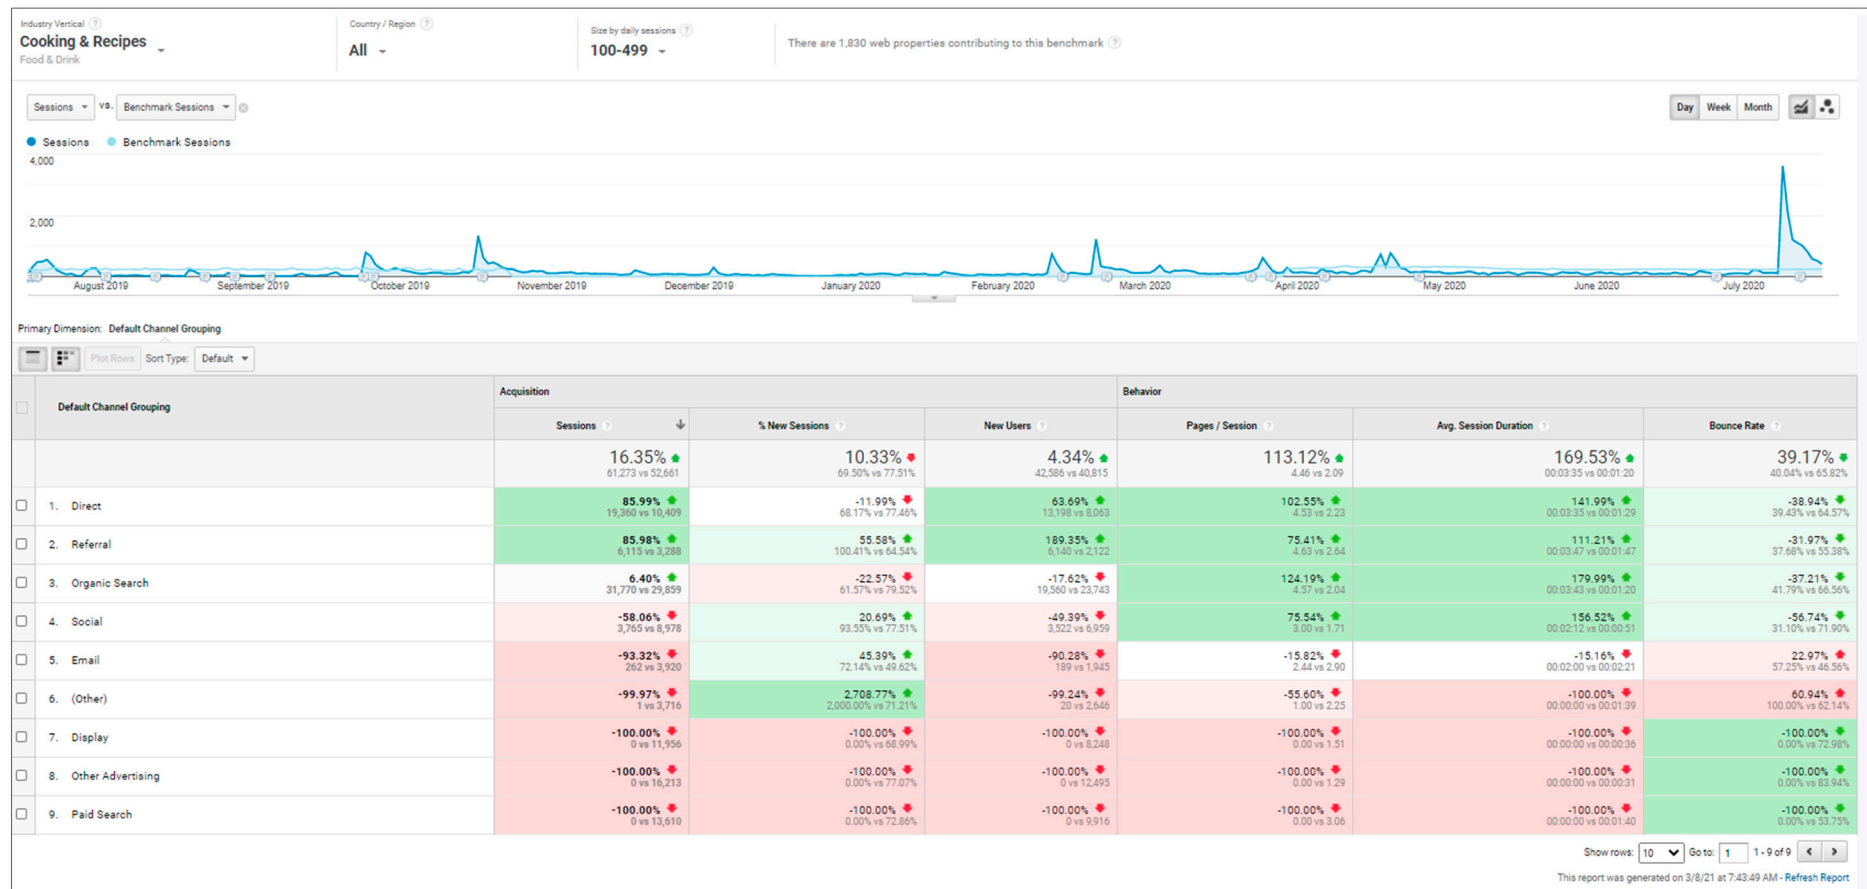

**Figure 15.** Google analytics 'benchmarking' comparison of traffic acquisition 'No Money No Time' with aggregated industry data from 1830 websites with 'Cooking & Recipes' category from 17 July 2019 to 17 July 2020.

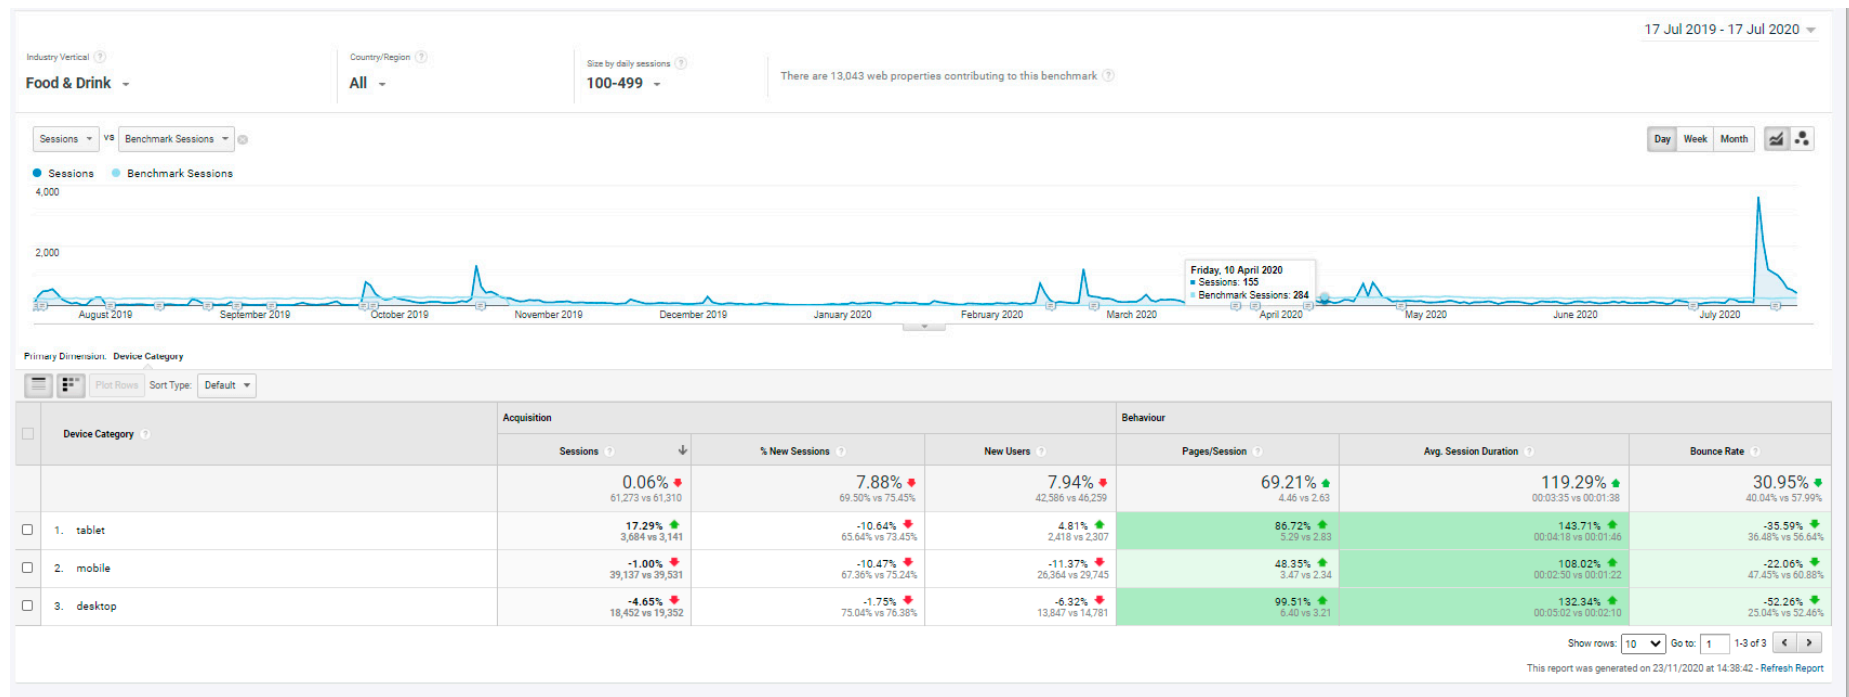

**Figure 16.** Google analytics ‘benchmarking’ comparison of device type recruitment and engagement data of ‘No Money No Time’ with aggregated industry data from 13,034 food and drink websites from 17 July 2019 to 17 July 2020.
